# Supplementary material for: c-Myc/microRNA-17-92 Axis Phase-Dependently Regulates PTEN and p21 Expression via ceRNA during Reprogramming to Mouse Pluripotent Stem Cells
Source: MDPI journal article supplement (doi:10.3390/biomedicines11061737), 2023-06-16
Supplement: s1 [file s1]

## Supplementary Materials

**Table S1.** GO terms enriched with OSKM-upregulated genes with miR-17/miR-20a-binding motifs.

| GO Terms                                                             | Gene Counts |
|----------------------------------------------------------------------|-------------|
| Regulation of transcription, DNA-templated                           | 63          |
| Transcription, DNA-templated                                         | 57          |
| Positive regulation of transcription from RNA polymerase II promoter | 31          |
| Multicellular organism development                                   | 24          |
| Negative regulation of transcription from RNA polymerase II promoter | 18          |
| Cell differentiation                                                 | 18          |
| Positive regulation of transcription, DNA-templated                  | 17          |
| Negative regulation of transcription, DNA-templated                  | 17          |
| Apoptotic process                                                    | 16          |
| Cell cycle                                                           | 13          |
| Regulation of transcription from RNA polymerase II promoter          | 12          |
| Positive regulation of cell proliferation                            | 11          |
| Nervous system development                                           | 10          |
| Cellular response to DNA damage stimulus                             | 10          |
| Heart development                                                    | 9           |
| Negative regulation of cell proliferation                            | 9           |
| mRNA processing                                                      | 8           |
| Regulation of cell cycle                                             | 7           |
| Negative regulation of gene expression                               | 7           |
| Wnt signaling pathway                                                | 6           |

**Table S2.** GO terms enriched with OSKM-upregulated genes with miR-18a-binding motifs.

| GO Terms                                                             | Gene Counts |
|----------------------------------------------------------------------|-------------|
| Transcription, DNA-templated                                         | 16          |
| Regulation of transcription, DNA-templated                           | 16          |
| Negative regulation of transcription from RNA polymerase II promoter | 8           |
| Regulation of transcription from RNA polymerase II promoter          | 6           |
| Multicellular organism development                                   | 6           |
| Nervous system development                                           | 5           |
| Apoptotic process                                                    | 5           |
| Brain development                                                    | 4           |
| Positive regulation of apoptotic process                             | 4           |
| Dephosphorylation                                                    | 3           |
| Neuron projection development                                        | 3           |
| Cellular response to magnesium ion                                   | 2           |
| Magnesium ion homeostasis                                            | 2           |
| Multicellular organismal response to stress                          | 2           |
| Adult heart development                                              | 2           |
| Retinal ganglion cell axon guidance                                  | 2           |
| Startle response                                                     | 2           |
| Positive regulation of osteoclast differentiation                    | 2           |
| Endothelial cell migration                                           | 2           |
| Positive regulation of axonogenesis                                  | 2           |

**Table S3.** GO terms enriched with OSKM-upregulated genes with miR-19a/b-binding motifs.

| GO Terms                                                             | Gene Counts |
|----------------------------------------------------------------------|-------------|
| Regulation of transcription, DNA-templated                           | 18          |
| Transcription, DNA-templated                                         | 15          |
| Negative regulation of transcription from RNA polymerase II promoter | 9           |
| Intracellular signal transduction                                    | 7           |
| Positive regulation of transcription, DNA-templated                  | 7           |
| Negative regulation of transcription, DNA-templated                  | 7           |
| Protein phosphorylation                                              | 6           |
| Positive regulation of apoptotic process                             | 5           |
| Memory                                                               | 4           |
| Neuron projection development                                        | 4           |
| Brain development                                                    | 4           |
| Membrane fusion                                                      | 3           |
| Social behavior                                                      | 3           |
| Skin development                                                     | 3           |
| Learning                                                             | 3           |
| Negative regulation of cell migration                                | 3           |
| Post-embryonic development                                           | 3           |
| Positive regulation of cytoplasmic mrna processing body assembly     | 2           |
| Intracellular cholesterol transport                                  | 2           |
| Synapse maturation                                                   | 2           |

**Table S4.** GO terms enriched with OSKM-upregulated genes with miR-92a-binding motifs.

| GO Terms                                                             | Gene Counts |
|----------------------------------------------------------------------|-------------|
| Regulation of transcription, DNA-templated                           | 43          |
| Transcription, DNA-templated                                         | 42          |
| Positive regulation of transcription from RNA polymerase II promoter | 24          |
| Negative regulation of transcription from RNA polymerase II promoter | 19          |
| Multicellular organism development                                   | 14          |
| Regulation of transcription from RNA polymerase II promoter          | 13          |
| Positive regulation of transcription, DNA-templated                  | 13          |
| Apoptotic process                                                    | 11          |
| Phosphorylation                                                      | 11          |
| Negative regulation of cell proliferation                            | 9           |
| Brain development                                                    | 8           |
| Positive regulation of gene expression                               | 8           |
| Covalent chromatin modification                                      | 7           |
| Regulation of gene expression                                        | 7           |
| Nervous system development                                           | 7           |
| Rhythmic process                                                     | 6           |
| Hippocampus development                                              | 5           |
| Cellular response to insulin stimulus                                | 5           |
| Microtubule cytoskeleton organization                                | 5           |
| Homophilic cell adhesion via plasma membrane adhesion molecules      | 5           |

**Table S5.** OSKM-upregulated genes enriched in GO term “regulation of cell cycle”.

| miRNAs     | Target Genes                                                                                                                                                         |
|------------|----------------------------------------------------------------------------------------------------------------------------------------------------------------------|
| miR-17/20a | Arid4b, Bid, Ccnd1, Cdkn1a, Clock, E2f2, Fzd3, Kat2b, Kif13a, Kif23, Mecp2, Myo19, Myo9a, Plcb1, Pten, Ptpn3, Pura, Rb1, Rbl2, Rpa2, Tal1, Trim37, Trp53inp1, Ubxn2b |
| miR-18a/b  | Fam83d, Hecw2, Hnrnpu, L3mbtl, Mecp2, Plcb1, Pten, Trp53inp1, Ubxn2b                                                                                                 |
| miR-19     | Jmy, Mecp2, Notch2, Pten, Zfp207                                                                                                                                     |
| miR-92a    | Btg2, Cdk6, Ddx3x, Fbxw7, Hnrnpu, Jmy, Kat2b, Klf4, Mdm4, Pten, Rad21, Rbl2, Stag2                                                                                   |
